# Supplementary material for: Assembly of a series of MOFs based on the 2-(m-methoxyphenyl)imidazole dicarboxylate ligand
Source: Royal Society of Chemistry journal article supplement (doi:10.1039/c2dt32727a), 2012-12-17
Supplement: c2dt32727a.pdf [file c2dt32727a.pdf]

# Assembly of a series of MOFs based on the 2-(*m*-methoxyphenyl)-imidazole dicarboxylate ligand

Zhi-Fang Xiong, Rui-Min Gao, Zhengkun Xie, Bei-Bei Guo, Li Li, Yan-Yan Zhu,  
Gang Li\*

Department of Chemistry, Zhengzhou University, Zhengzhou 450052, Henan, P. R.  
China

## Supporting information

**Table S1.** Selected bond distances (Å) and angles (deg) for compounds **1–7**

| <b>1<sup>a</sup></b> |            |                     |            |
|----------------------|------------|---------------------|------------|
| Sr(1)-O(7)#1         | 2.4828(18) | Sr(1)-O(5)          | 2.542(2)   |
| Sr(1)-O(6)#2         | 2.544(2)   | Sr(1)-O(3)#1        | 2.677(2)   |
| Sr(1)-O(3)           | 2.701(2)   | Sr(1)-O(6)          | 2.7013(19) |
| Sr(1)-O(7)           | 2.719(2)   | Sr(1)-O(2)          | 2.775(3)   |
| O(7)#1-Sr(1)-O(5)    | 70.70(7)   | O(7)#1-Sr(1)-O(6)#2 | 157.68(6)  |
| O(5)-Sr(1)-O(6)#2    | 97.23(7)   | O(7)#1-Sr(1)-O(3)#1 | 64.68(6)   |
| O(5)-Sr(1)-O(3)#1    | 114.68(7)  | O(6)#2-Sr(1)-O(3)#1 | 106.51(6)  |
| O(7)#1-Sr(1)-O(3)    | 132.62(6)  | O(5)-Sr(1)-O(3)     | 113.63(6)  |
| O(6)#2-Sr(1)-O(3)    | 69.08(6)   | O(3)#1-Sr(1)-O(3)   | 131.64(3)  |
| O(7)#1-Sr(1)-O(6)    | 75.37(6)   | O(5)-Sr(1)-O(6)     | 139.59(7)  |
| O(6)#2-Sr(1)-O(6)    | 121.67(5)  | O(3)#1-Sr(1)-O(6)   | 67.21(6)   |
| O(3)-Sr(1)-O(6)      | 75.04(6)   | O(7)#1-Sr(1)-O(7)   | 118.33(5)  |
| O(5)-Sr(1)-O(7)      | 170.96(6)  | O(6)#2-Sr(1)-O(7)   | 74.08(6)   |
| O(3)#1-Sr(1)-O(7)    | 71.04(6)   | O(3)-Sr(1)-O(7)     | 61.35(6)   |
| O(6)-Sr(1)-O(7)      | 48.35(6)   | O(7)#1-Sr(1)-O(2)   | 88.87(7)   |
| O(5)-Sr(1)-O(2)      | 69.69(7)   | O(6)#2-Sr(1)-O(2)   | 69.10(7)   |
| O(3)#1-Sr(1)-O(2)    | 64.43(7)   | O(3)-Sr(1)-O(2)     | 138.11(7)  |

|                     |           |                     |           |
|---------------------|-----------|---------------------|-----------|
| O(6)-Sr(1)-O(2)     | 131.33(7) | O(7)-Sr(1)-O(2)     | 108.54(7) |
| O(7)#1-Sr(1)-O(5)#3 | 109.74(7) | O(5)-Sr(1)-O(5)#3   | 67.01(8)  |
| O(6)#2-Sr(1)-O(5)#3 | 80.85(6)  | O(3)#1-Sr(1)-O(5)#3 | 171.81(6) |
| O(3)-Sr(1)-O(5)#3   | 47.05(6)  | O(6)-Sr(1)-O(5)#3   | 106.06(6) |
| O(7)-Sr(1)-O(5)#3   | 108.40(6) | O(2)-Sr(1)-O(5)#3   | 122.58(7) |

**2<sup>b</sup>**

|                     |            |                     |            |
|---------------------|------------|---------------------|------------|
| Sr(1)-O(2)#2        | 2.548(3)   | Sr(1)-O(4)          | 2.488(3)   |
| Sr(1)-O(2)#4        | 2.773(3)   | Sr(1)-N(1)          | 2.737(3)   |
| O(4)#1-Sr(1)-O(4)   | 97.30(17)  | O(2)#2-Sr(1)-O(2)#3 | 100.00(14) |
| O(4)-Sr(1)-O(2)#2   | 152.75(10) | O(4)-Sr(1)-N(1)#1   | 79.32(10)  |
| O(4)-Sr(1)-O(2)#3   | 87.72(10)  | O(2)#3-Sr(1)-N(1)#1 | 90.94(10)  |
| N(1)#1-Sr(1)-N(1)   | 123.69(15) | O(4)-Sr(1)-N(1)     | 64.01(10)  |
| O(4)#1-Sr(1)-O(2)#4 | 99.06(10)  | O(2)#3-Sr(1)-N(1)   | 126.17(9)  |
| O(4)-Sr(1)-O(2)#4   | 141.35(9)  | O(2)#2-Sr(1)-O(2)#4 | 62.84(5)   |
| N(1)-Sr(1)-O(2)#4   | 153.77(9)  | N(1)#1-Sr(1)-O(2)#4 | 76.89(9)   |
| O(4)-Sr(1)-O(2)#5   | 99.06(10)  | O(2)#2-Sr(1)-O(2)#5 | 62.84(5)   |
| N(1)-Sr(1)-O(2)#5   | 76.89(9)   | N(1)#1-Sr(1)-O(2)#5 | 153.77(9)  |
| O(2)#4-Sr(1)-O(2)#5 | 89.50(12)  |                     |            |

**3<sup>c</sup>**

|                   |           |                     |            |
|-------------------|-----------|---------------------|------------|
| N(1)-Cd(2)        | 2.311(5)  | O(6)-Cd(1)          | 2.387(4)   |
| N(3)-Cd(1)        | 2.314(5)  | O(9)-Cd(2)#2        | 2.283(4)   |
| N(4)-Cd(2)#1      | 2.246(5)  | O(9)-Cd(2)#1        | 2.408(4)   |
| O(1)-Cd(1)        | 2.363(5)  | O(11)-Cd(2)         | 2.318(5)   |
| O(2)-Cd(2)        | 2.299(4)  | Cd(1)-N(3)#3        | 2.314(5)   |
| Cd(1)-O(1)#3      | 2.363(5)  | Cd(1)-O(6)#3        | 2.387(4)   |
| Cd(2)-N(4)#1      | 2.246(5)  | Cd(2)-O(9)#4        | 2.283(4)   |
| N(3)-Cd(1)-N(3)#3 | 180.00    | N(3)#3-Cd(1)-O(1)   | 91.22(17)  |
| N(3)-Cd(1)-O(1)   | 88.78(17) | N(3)#3-Cd(1)-O(1)#3 | 88.78(17)  |
| N(3)-Cd(1)-O(1)#3 | 91.22(17) | O(1)-Cd(1)-O(1)#3   | 180.000(1) |

|                     |            |                     |            |
|---------------------|------------|---------------------|------------|
| N(3)#3-Cd(1)-O(6)#3 | 72.98(16)  | N(3)-Cd(1)-O(6)#3   | 107.02(16) |
| O(1)-Cd(1)-O(6)#3   | 102.37(16) | O(1)#3-Cd(1)-O(6)#3 | 77.63(16)  |
| N(3)#3-Cd(1)-O(6)   | 107.02(16) | N(3)-Cd(1)-O(6)     | 72.98(16)  |
| O(1)-Cd(1)-O(6)     | 77.63(16)  | O(1)#3-Cd(1)-O(6)   | 102.37(16) |
| O(6)#3-Cd(1)-O(6)   | 180.000(1) | N(4)#1-Cd(2)-O(9)#4 | 142.97(17) |
| N(4)#1-Cd(2)-O(2)   | 106.02(17) | O(9)#4-Cd(2)-O(2)   | 87.16(16)  |
| N(4)#1-Cd(2)-N(1)   | 111.86(18) | O(9)#4-Cd(2)-N(1)   | 105.00(17) |
| O(2)-Cd(2)-N(1)     | 73.79(17)  | N(4)#1-Cd(2)-O(11)  | 93.15(19)  |
| O(9)#4-Cd(2)-O(11)  | 83.51(19)  | O(2)-Cd(2)-O(11)    | 158.17(18) |
| N(1)-Cd(2)-O(11)    | 89.61(19)  | N(4)#1-Cd(2)-O(9)#1 | 71.43(16)  |
| O(9)#4-Cd(2)-O(9)#1 | 71.61(17)  | O(2)-Cd(2)-O(9)#1   | 114.12(16) |
| N(1)-Cd(2)-O(9)#1   | 170.76(18) | O(11)-Cd(2)-O(9)#1  | 81.50(18)  |

**4<sup>d</sup>**

|                   |            |                   |            |
|-------------------|------------|-------------------|------------|
| Cu(1)-N(4)#1      | 1.987(2)   | Cu(1)-O(3)        | 1.9966(16) |
| Cu(1)-N(2)        | 2.0106(18) | Cu(1)-N(3)        | 2.010(2)   |
| Cu(1)-N(1)        | 2.2853(18) | N(4)-Cu(1)#2      | 1.987(2)   |
| N(4)#1-Cu(1)-O(3) | 89.16(7)   | N(4)#1-Cu(1)-N(2) | 91.24(7)   |
| O(3)-Cu(1)-N(2)   | 177.25(7)  | N(4)#1-Cu(1)-N(3) | 163.49(8)  |
| O(3)-Cu(1)-N(3)   | 83.12(6)   | N(2)-Cu(1)-N(3)   | 97.17(7)   |
| N(4)#1-Cu(1)-N(1) | 109.89(7)  | O(3)-Cu(1)-N(1)   | 99.61(7)   |
| N(2)-Cu(1)-N(1)   | 77.69(7)   | N(3)-Cu(1)-N(1)   | 85.86(7)   |

**5<sup>c</sup>**

|                 |          |                 |          |
|-----------------|----------|-----------------|----------|
| N(1)-Cd(2)      | 2.248(6) | N(2)-Cd(1)      | 2.300(6) |
| N(3)-Cd(1)      | 2.351(7) | N(4)-Cd(1)      | 2.332(7) |
| N(5)-Cd(2)      | 2.318(7) | N(6)-Cd(2)      | 2.381(7) |
| N(7)-Cd(2)      | 2.276(6) | N(8)-Cd(1)      | 2.237(6) |
| O(1)-Cd(2)      | 2.391(6) | O(4)-Cd(1)      | 2.379(5) |
| O(6)-Cd(1)      | 2.416(6) | O(9)-Cd(2)      | 2.387(6) |
| N(8)-Cd(1)-N(2) | 114.0(5) | N(8)-Cd(1)-N(3) | 98.7(2)  |

|                 |          |                 |          |
|-----------------|----------|-----------------|----------|
| N(2)-Cd(1)-N(3) | 94.5(2)  | N(8)-Cd(1)-N(4) | 105.8(2) |
| N(2)-Cd(1)-N(4) | 139.4(2) | N(3)-Cd(1)-N(4) | 71.3(3)  |
| N(8)-Cd(1)-O(4) | 146.3(2) | N(2)-Cd(1)-O(4) | 73.1(2)  |
| N(3)-Cd(1)-O(4) | 113.9(2) | N(4)-Cd(1)-O(4) | 78.5(2)  |
| N(8)-Cd(1)-O(6) | 71.9(2)  | N(2)-Cd(1)-O(6) | 89.5(2)  |
| N(3)-Cd(1)-O(6) | 170.6(2) | N(4)-Cd(1)-O(6) | 110.8(3) |
| O(4)-Cd(1)-O(6) | 75.4(2)  | N(1)-Cd(2)-N(7) | 150.3(2) |
| N(1)-Cd(2)-N(5) | 103.6(2) | N(7)-Cd(2)-N(5) | 100.5(2) |
| N(1)-Cd(2)-N(6) | 119.8(2) | N(7)-Cd(2)-N(6) | 73.0(3)  |
| N(5)-Cd(2)-O(9) | 158.0(3) | N(6)-Cd(2)-O(9) | 84.6(2)  |
| O(1)-Cd(2)-O(9) | 109.5(2) | N(7)-Cd(2)-O(1) | 89.1(2)  |

**6<sup>f</sup>**

|                  |           |                  |            |
|------------------|-----------|------------------|------------|
| Cd(1)-N(8)       | 2.268(3)  | Cd(1)-N(2)       | 2.306(3)   |
| Cd(1)-N(4)       | 2.337(3)  | Cd(1)-O(3)       | 2.349(3)   |
| Cd(1)-N(3)       | 2.378(3)  | Cd(1)-O(10)      | 2.4285(19) |
| Cd(2)-N(10)      | 2.278(3)  | Cd(2)-N(1)       | 2.292(3)   |
| Cd(2)-N(5)       | 2.326(3)  | Cd(2)-O(5)       | 2.359(2)   |
| Cd(2)-O(2)       | 2.360(2)  | Cd(2)-N(6)       | 2.373(3)   |
| N(8)-Cd(1)-N(2)  | 139.62(9) | N(8)-Cd(1)-N(4)  | 96.83(9)   |
| N(2)-Cd(1)-N(4)  | 113.89(9) | N(8)-Cd(1)-O(3)  | 89.76(9)   |
| N(2)-Cd(1)-O(3)  | 73.45(8)  | N(4)-Cd(1)-O(3)  | 155.19(8)  |
| N(8)-Cd(1)-N(3)  | 109.63(9) | N(2)-Cd(1)-N(3)  | 105.27(9)  |
| N(4)-Cd(1)-N(3)  | 70.13(9)  | O(3)-Cd(1)-N(3)  | 85.11(8)   |
| N(8)-Cd(1)-O(10) | 71.97(8)  | N(2)-Cd(1)-O(10) | 82.47(8)   |
| N(4)-Cd(1)-O(10) | 89.20(8)  | O(3)-Cd(1)-O(10) | 115.55(7)  |
| N(3)-Cd(1)-O(10) | 159.33(8) | N(10)-Cd(2)-N(1) | 118.70(9)  |
| N(10)-Cd(2)-N(5) | 99.92(9)  | N(1)-Cd(2)-N(5)  | 105.92(9)  |
| N(10)-Cd(2)-O(5) | 73.01(8)  | N(1)-Cd(2)-O(5)  | 91.04(8)   |
| N(5)-Cd(2)-O(5)  | 162.89(8) | N(10)-Cd(2)-O(2) | 162.42(8)  |

|                 |           |                  |          |
|-----------------|-----------|------------------|----------|
| N(1)-Cd(2)-O(2) | 72.82(8)  | N(5)-Cd(2)-O(2)  | 88.53(8) |
| O(5)-Cd(2)-O(2) | 94.51(8)  | N(10)-Cd(2)-N(6) | 81.86(9) |
| N(1)-Cd(2)-N(6) | 159.11(9) | N(5)-Cd(2)-N(6)  | 71.51(9) |
| O(5)-Cd(2)-N(6) | 91.85(8)  | O(2)-Cd(2)-N(6)  | 86.33(8) |

7<sup>g</sup>

|                     |            |                     |            |
|---------------------|------------|---------------------|------------|
| Co(1)-O(6)#1        | 2.0789(19) | Co(1)-O(6)          | 2.0789(19) |
| Co(1)-O(2)          | 2.0890(17) | Co(1)-O(2)#1        | 2.0890(17) |
| Co(1)-N(2)#1        | 2.2061(19) | Co(1)-N(2)          | 2.2061(19) |
| Co(2)-O(7)          | 2.0606(18) | Co(2)-O(7)#2        | 2.0606(18) |
| Co(2)-N(1)#2        | 2.1465(19) | Co(2)-N(1)          | 2.1465(19) |
| Co(2)-O(5)          | 2.1514(17) | Co(2)-O(5)#2        | 2.1514(17) |
| O(6)#1-Co(1)-O(6)   | 180.0      | O(6)#1-Co(1)-O(2)   | 89.91(7)   |
| O(6)-Co(1)-O(2)     | 90.09(7)   | O(6)#1-Co(1)-O(2)#1 | 90.09(7)   |
| O(6)-Co(1)-O(2)#1   | 89.91(7)   | O(2)-Co(1)-O(2)#1   | 180.0      |
| O(6)#1-Co(1)-N(2)#1 | 91.13(8)   | O(6)-Co(1)-N(2)#1   | 88.87(8)   |
| O(2)-Co(1)-N(2)#1   | 100.16(7)  | O(2)#1-Co(1)-N(2)#1 | 79.84(7)   |
| O(6)#1-Co(1)-N(2)   | 88.87(8)   | O(6)-Co(1)-N(2)     | 91.13(8)   |
| O(2)-Co(1)-N(2)     | 79.84(7)   | O(2)#1-Co(1)-N(2)   | 100.16(7)  |
| N(2)#1-Co(1)-N(2)   | 180.0      | O(7)-Co(2)-O(7)#2   | 180.00(10) |
| O(7)-Co(2)-N(1)#2   | 88.31(7)   | O(7)#2-Co(2)-N(1)#2 | 91.69(7)   |
| O(7)-Co(2)-N(1)     | 91.69(7)   | O(7)#2-Co(2)-N(1)   | 88.31(7)   |
| N(1)#2-Co(2)-N(1)   | 180.00(9)  | O(7)-Co(2)-O(5)     | 92.22(7)   |
| O(7)#2-Co(2)-O(5)   | 87.78(7)   | N(1)#2-Co(2)-O(5)   | 101.33(7)  |
| N(1)-Co(2)-O(5)     | 78.67(7)   | O(7)-Co(2)-O(5)#2   | 87.78(7)   |
| O(7)#2-Co(2)-O(5)#2 | 92.22(7)   | N(1)#2-Co(2)-O(5)#2 | 78.67(7)   |
| N(1)-Co(2)-O(5)#2   | 101.33(7)  | O(5)-Co(2)-O(5)#2   | 180.00(14) |

Symmetry transformations used to generate equivalent atoms: <sup>a</sup> #1: -x+1, y+1/2, -z+3/2.  
<sup>b</sup> #2: -x+1, y-1/2, -z+3/2. #3: -x+1, -y+1, -z+1. <sup>b</sup> #1: -x+1, -y+1/2, z+0. #2: y-1/4, -x+3/4,  
 z-1/4. #3: -y+5/4, x-1/4, z-1/4. #4: x, y-1/2, -z. #5: -x+1, -y+1, -z. <sup>c</sup> #1: -x+2, -y+2, -z+1  
<sup>d</sup> #2: x+1, y, z. #3: -x+2, -y+1, -z+1. #4: x-1, y, z. <sup>d</sup> #1: -x+1/2, y+1/2, z. #2: -x+1/2, y-1/2,

z. <sup>c</sup>#1: -x+1, y-1/2, -z+1/2. #2: -x+1, y+1/2, -z+1/2. <sup>f</sup>#1: -x+2, y-1/2, -z. #2: -x+2,  
y+1/2, -z. <sup>g</sup>#1: -x+1, -y, -z+1. #2: -x+2, -y, -z

---

**Table S2.** Hydrogen bonds distances (Å) and angles (deg) for **1**, **3**, **4**, **6** and **7**.

| <b>1<sup>a</sup></b>  |           |          |        |
|-----------------------|-----------|----------|--------|
| D-H...A               | d(H...A)  | d(D...A) | ∠(DHA) |
| O(2)-H(1W)...N(3)#6   | 2.10(5)   | 2.800(4) | 166(5) |
| N(2)-H(2W)...O(2)#1   | 1.966(18) | 2.808(6) | 171(9) |
| <b>3<sup>c</sup></b>  |           |          |        |
| O(3)-H(3)...O(1)      | 1.74      | 2.556(7) | 170.8  |
| O(7)-H(7)...O(8)      | 1.66      | 2.476(6) | 174.9  |
| N(2)-H(2)...O(5)#5    | 2.26      | 3.073(8) | 156.8  |
| O(11)-H(11A)...O(6)#6 | 2.23      | 2.859(6) | 131.3  |
| O(11)-H(11B)...O(7)#6 | 2.56      | 3.146(7) | 126.6  |
| <b>4<sup>d</sup></b>  |           |          |        |
| O(5)-H(5)...O(2)      | 1.68      | 2.493(2) | 173.1  |
| <b>6<sup>f</sup></b>  |           |          |        |
| O(9)-H(9A)...O(1)#3   | 2.32      | 3.046(4) | 148.6  |
| O(9)-H(9A)...O(7)#3   | 2.65      | 3.361(4) | 145.6  |
| O(8)-H(8A)...O(9)#1   | 1.66      | 2.476(4) | 178.8  |
| <b>7<sup>g</sup></b>  |           |          |        |
| O(4)-H(4)...O(3)      | 1.65      | 2.465(2) | 175.8  |
| O(7)-H(7)...O(3)#3    | 1.87      | 2.678(2) | 170.2  |
| O(6)-H(6)...O(5)#4    | 1.99      | 2.781(2) | 162.7  |
| O(7)-H(10)...O(1)#5   | 1.82(4)   | 2.694(3) | 169(4) |

<sup>a</sup> #6: -x+1, -y+1, -z+2 <sup>c</sup>#5: -x+1, -y+2, -z+2, #6: x-1, y+1, z. <sup>f</sup>#3: x+1, y, z. <sup>g</sup>#3: -x+1, -y, -z, #4: x, y, z+1. #5: x, y, z-1.

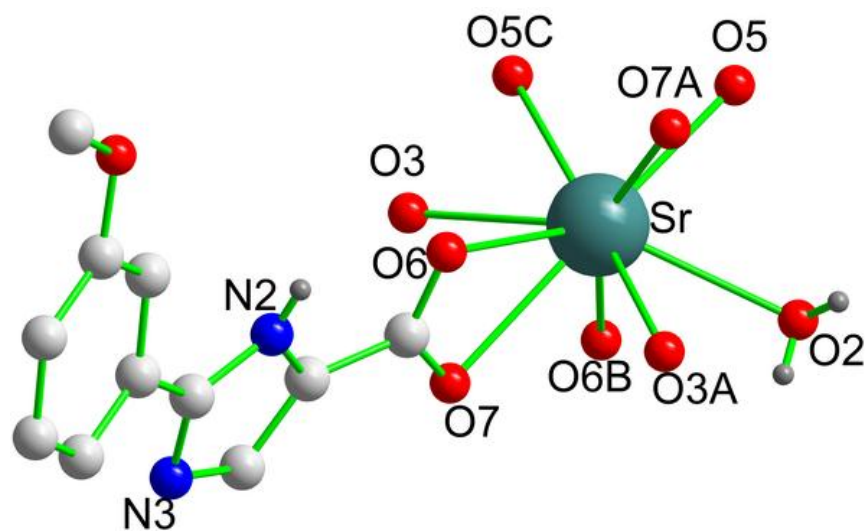

Figure S1. Molecular structure of complex **1** (H atoms omitted for clarity).

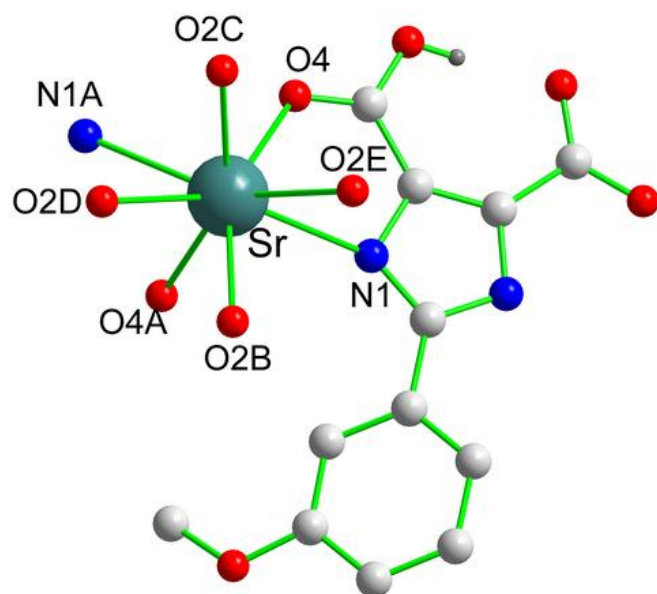

Figure S2. Coordination arrangement of the Sr(II) in complex **2** (H atoms omitted for clarity)



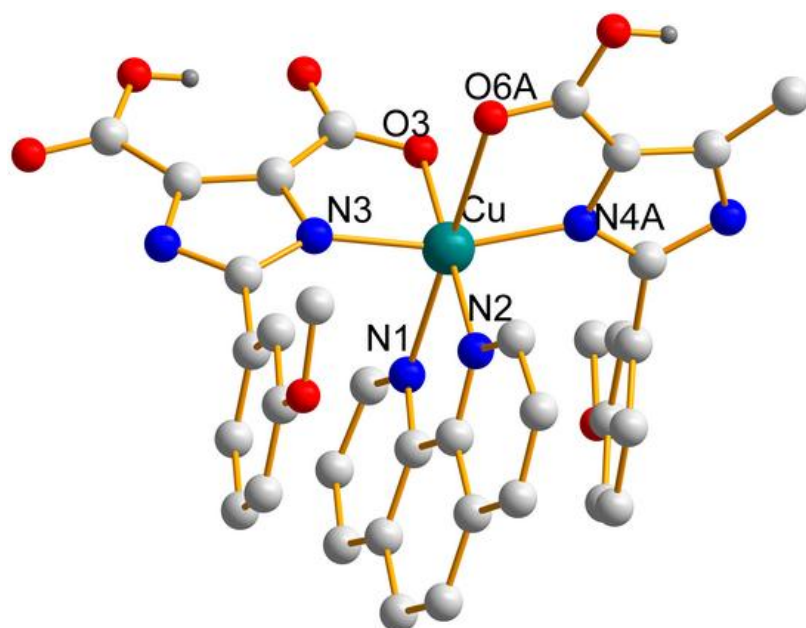

Figure S3. Coordination environment of Cu(II) atom in polymer **4** (H atoms omitted for clarity).

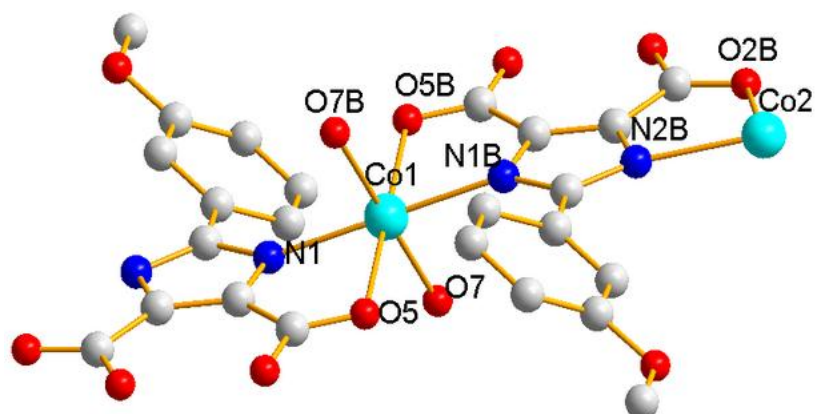

Figure S4. Coordination environment of Co(II) atom in polymer **7** (H atoms omitted for clarity).
